# Supplementary material for: A facile and fast synthetic approach to create selenium nanoparticles with diverse shapes and their antioxidation ability
Source: Royal Society of Chemistry journal article supplement (doi:10.1039/c5nj02519b), 2015-12-16
Supplement: c5nj02519b1.pdf [file c5nj02519b1.pdf]

## New Journal of Chemistry

### **A facile and fast synthetic approach to create selenium nanoparticles with diverse shape and their antioxidation property**

Bo Yu, \*<sup>†a</sup> Pengtao You,<sup>‡b</sup> Meifang Song,<sup>a</sup> Yang Zhou,<sup>a</sup> Faquan Yu,<sup>a</sup> Wenjie Zheng\*<sup>c</sup>

a. Key Laboratory for Green Chemical Process of Ministry of Education; Hubei Key Laboratory for Novel Reactor and Green Chemistry Technology; Wuhan Institute of Technology. Wuhan, Hubei 430073, PR China. E-mail: yuboxf@gmail.com

b. Key Laboratory of Resources and Chemistry of Chinese Medicine, Hubei university of Chinese Medicine, Wuhan, Hubei 430065, PR China.

c. Department of Chemistry, Jinan University, Guangzhou 510632, China. tzhwj@jnu.edu.cn

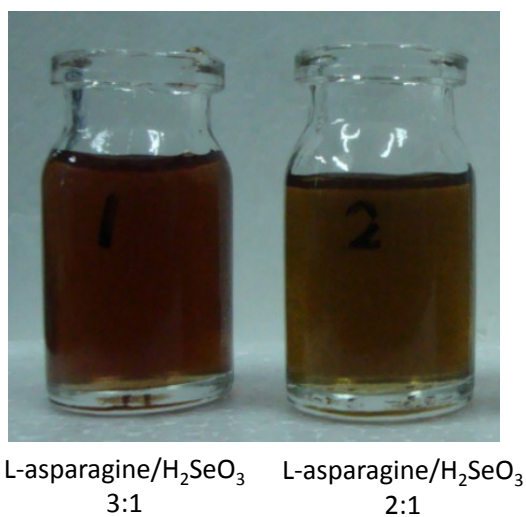

**Fig. S1** Color changes of the obtained SeNP with the 3:1 or 2:1 of L-asparagine/H<sub>2</sub>SeO<sub>3</sub> ratio and 10 min of irradiation treatment.

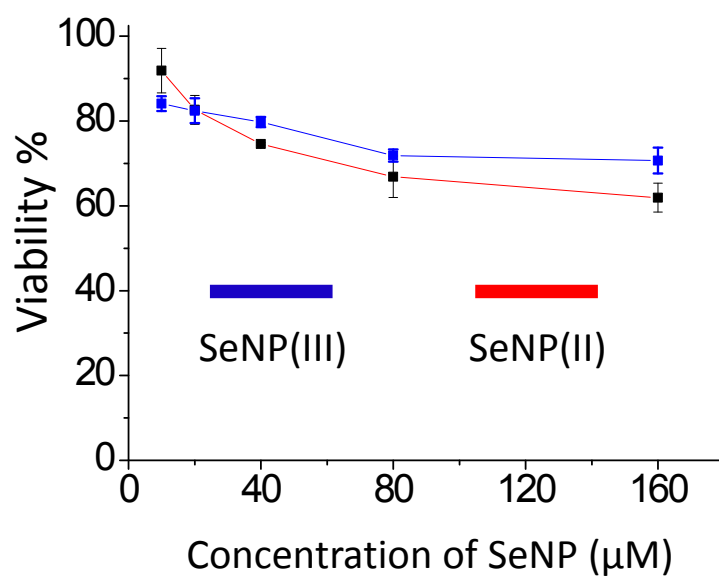

**Fig. S 2** Inhibition of HepG2 cells proliferation induced by SeNP(II) (red curve) and SeNP(III) (blue curve) incubated for 24 h.
